# Supplementary material for: Electrochemically Activated CNT Sheet as a Cathode for Zn-CO2 Batteries
Source: MDPI journal article supplement (doi:10.3390/ijms232012602), 2022-10-20
Supplement: s1 [file s1]

## Supplementary Information

### Electrochemically Activated CNT Sheet as a Cathode for Zn-CO<sub>2</sub> batteries

**Daniel Rui Chen** <sup>1, †</sup>, **Megha Chitranshi** <sup>2, †</sup>, **Vesselin Shanov** <sup>1, 3</sup>, and **Mark Schulz** <sup>2, \*</sup>

<sup>1</sup> Department of Mechanical and Materials Engineering, University of Cincinnati, OH 45221, USA

<sup>2</sup> Department of Electrical Engineering and Computer Science, University of Cincinnati, OH 45221, USA

<sup>3</sup> Department of Chemical and Environmental Engineering, University of Cincinnati, OH 45221, USA

† These authors contributed equally to this manuscript.

\* Correspondence: [schulzmk@ucmail.uc.edu](mailto:schulzmk@ucmail.uc.edu)

## Section S1. CV Analysis for Different Cu Deposition

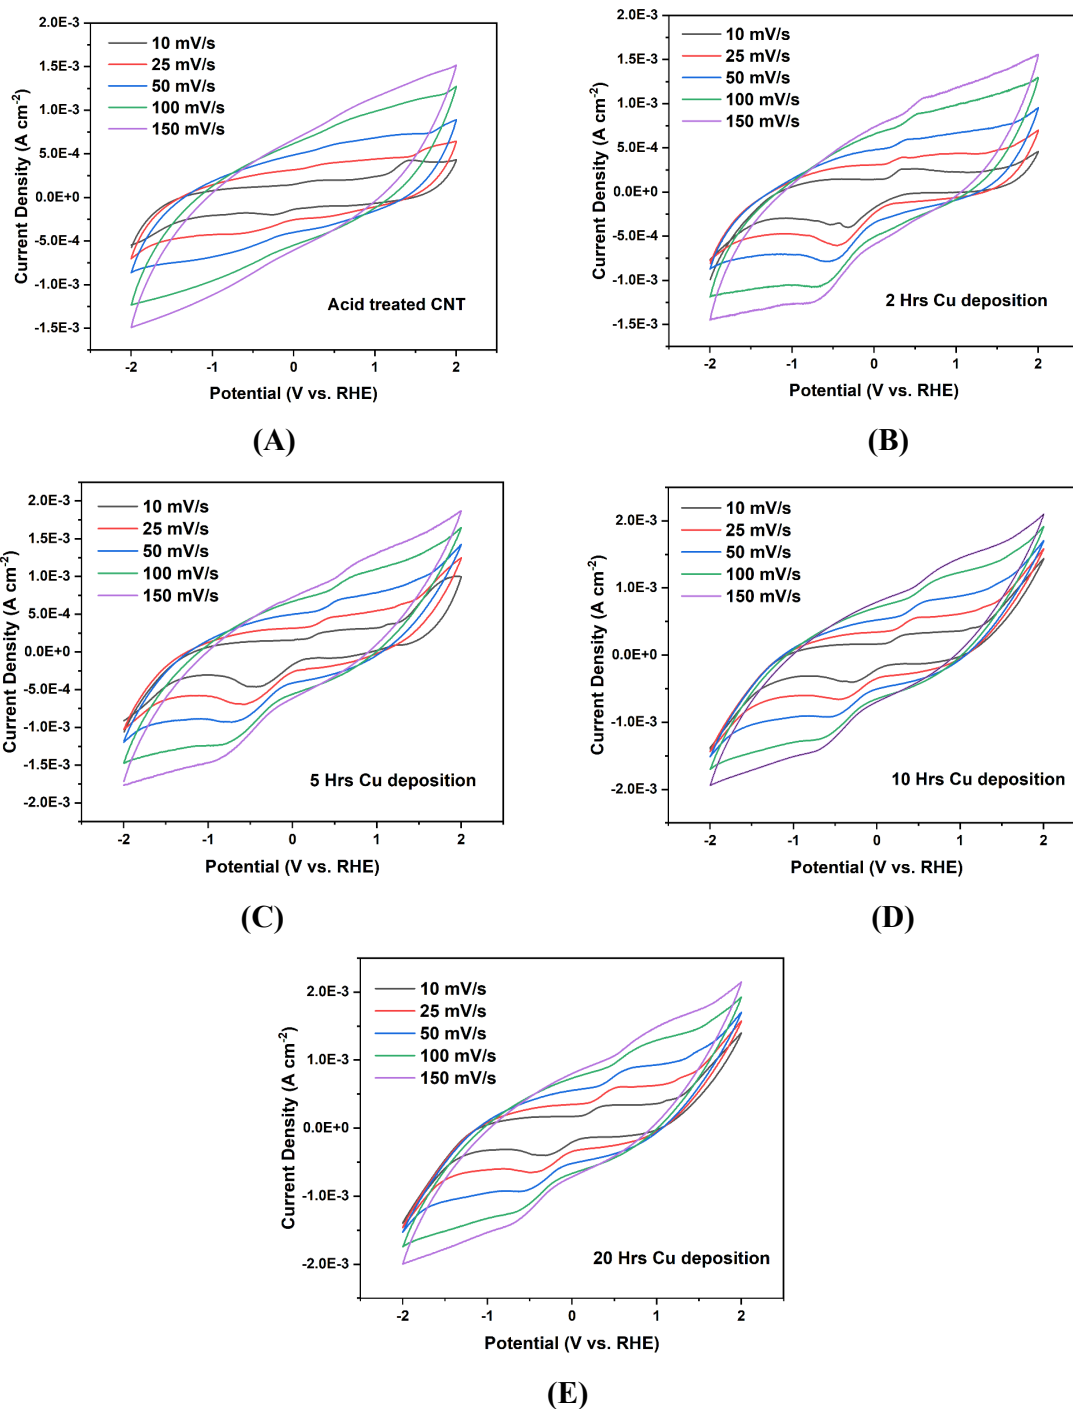

**Figure S1.** CV graphs of (A) acid treated CNT sheet (no Cu deposition); (B) activated and 2 hours Cu deposition; (C) activated and 5 hours of Cu deposition; (D) activated and 10 hours of Cu deposition; and (E) activated and 20 hours of Cu deposition.

## Section S2. Current Density for Different Cu Depositions

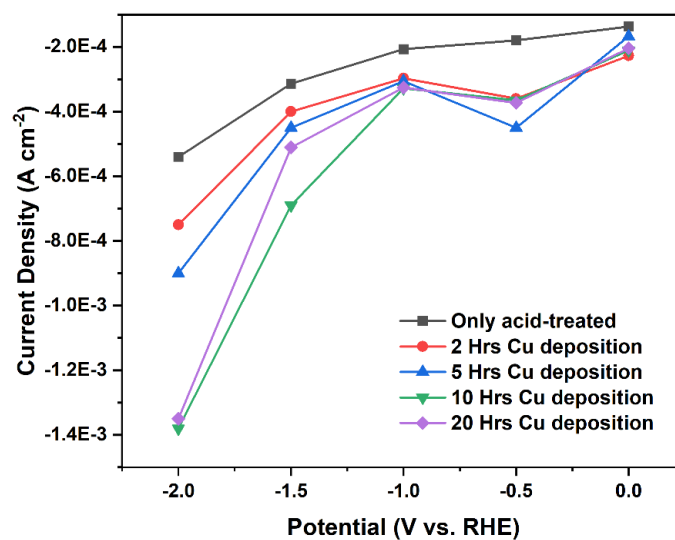

**Figure S2.** Current density comparison during CO<sub>2</sub> reduction between CNT samples with different Cu deposition.

### Section S3. The discharging time graph (using $\text{NaHCO}_3$ electrolyte on both sides)

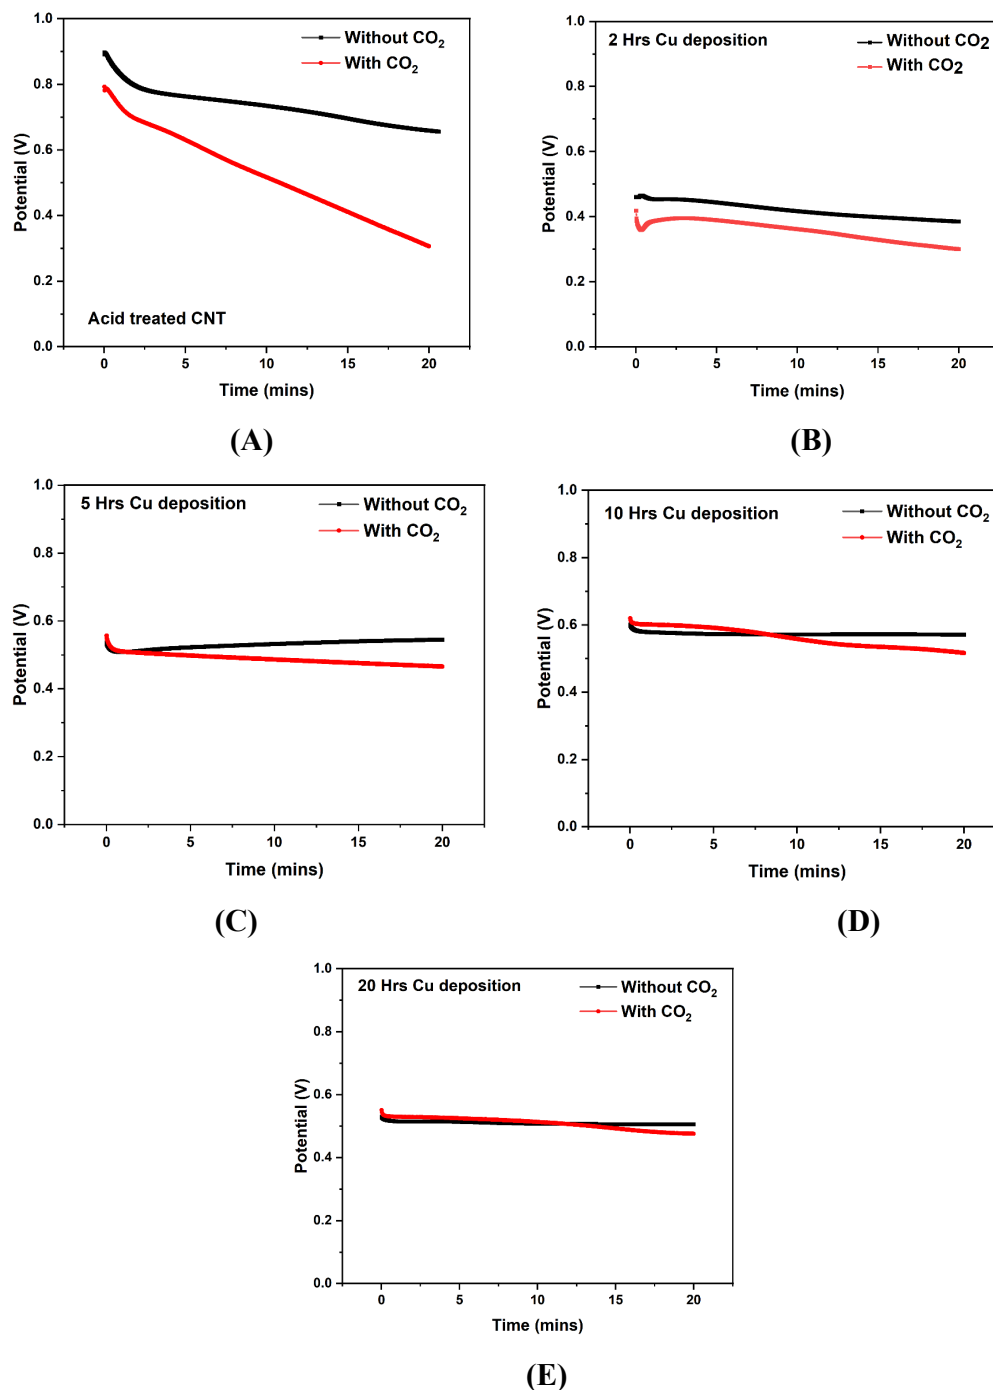

**Figure S3.** CV graphs ( $\text{NaHCO}_3$  electrolyte as the electrolyte) of (A) acid treated CNT sheet (no Cu deposition); (B) activated and 2 hours Cu deposition; (C) activated and 5 hours of Cu deposition; (D) activated and 10 hours of Cu deposition; and (E) activated and 20 hours of Cu deposition.

## Section S4. Calculation of Theoretical Potential of Zn-CO<sub>2</sub> battery

According to the results and analysis, the following reactions could take place:

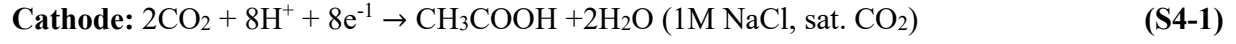

$$E_c = E_{\text{CO}_2/\text{CH}_3\text{COOH}}^\theta - \frac{RT}{nF} \ln \left[ \frac{\alpha_{\text{CH}_3\text{COOH}} \times \alpha_{\text{H}_2\text{O}}^2}{\alpha_{\text{CO}_2}^2 \times \alpha_{\text{H}^+}^8} \right] = 0.32 \text{ V} - \frac{8.314 \times 298.15}{8 \times 96485} \ln \frac{0.03}{1 \times (10^{-5.8})^8} = -0.039 \text{ V}$$
(S4-2)

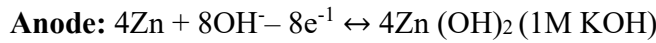

$$E_a = E_{\text{Zn}(\text{OH})_4^{2-}/\text{Zn}}^\theta - \frac{RT}{nF} \ln \left[ \frac{\alpha_{\text{Zn}(\text{OH})_4^{2-}}}{\alpha_{\text{Zn}}} \right] = -1.199 - \frac{8.314 \times 298.15}{2 \times 96485} \ln \left[ \frac{0.02}{1} \right] = -1.149 \text{ V}$$
(S4-3)

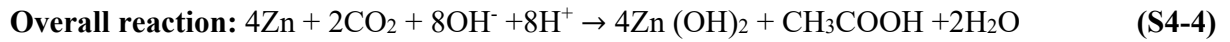

Therefore, the theoretical electromotive force of Zn-CO<sub>2</sub> battery:

$$E_{\text{Theoretical}} = E_c - E_a = 1.11 \text{ V}$$
(S4-5)

And theoretical energy density (ED) of the battery is

$$\text{ED}_{\text{Zn}} = C_{\text{Zn}} \times E_{\text{theo}} = 825 \text{ mAh g}^{-1} \times 1.11 \text{ V} = 915.75 \text{ Wh kg}^{-1}$$
(S4-6)

In above equations, R is 8.314 (molar gas constant), T is 298.15K, n is number of electrons transferred per mole of product, F is 96485 C/mol (Faradaic constant),  $\alpha$  is the chemical activity of corresponding ions or molecules,  $C_{\text{Zn}}$  is the theoretical capacity of the Zn anode-based battery.

## Section S5. Table of performance comparison between this work and other published work

**Table S1.** Table of performance comparison between this work and other published work.

| Cathode             | Anode | Electrolyte                                             | Potential  | Main Byproducts    | Ref              |
|---------------------|-------|---------------------------------------------------------|------------|--------------------|------------------|
| Cu deposited CNT    | Zinc  | NaCl +KOH                                               | 1.6        | Acetic acid        | <b>This work</b> |
| Carbon Hollow fiber | Zinc  | [EMIM] [BF <sub>4</sub> ]/<br>[EMIM] [BF <sub>4</sub> ] | 1.01       | Methane            | [1]              |
| Palladium           | Zinc  | KOH + NaCl/<br>H <sub>2</sub> O                         | 0.955      | Formic acid        | [2]              |
| CNT@Ni,<br>CNT@Cu   | Zinc  | [EMIM] [BF <sub>4</sub> ]                               | 0.98, 0.82 | CO, H <sub>2</sub> | [3]              |

## References

- [1] K. Wang, Y. Wu, X. Cao, L. Gu, J. Hu, A Zn–CO<sub>2</sub> Flow Battery Generating Electricity and Methane, *Advanced Functional Materials*. (2020). <https://doi.org/10.1002/adfm.201908965>.
- [2] J. Xie, X. Wang, J. Lv, Y. Huang, M. Wu, Y. Wang, J. Yao, Reversible Aqueous Zinc–CO<sub>2</sub> Batteries Based on CO<sub>2</sub> –HCOOH Interconversion , *Angewandte Chemie*. 130 (2018) 17242–17247. <https://doi.org/10.1002/ANGE.201811853>.
- [3] Y. Chen, Y. Mei, M. Li, C. Dang, L. Huang, W. Wu, Y. Wu, X. Yu, K. Wang, L. Gu, L. Liu, X. Cao, Highly selective CO<sub>2</sub> conversion to methane or syngas tuned by CNTs@non-noble-metal cathodes in Zn-CO<sub>2</sub> flow batteries, *Green Chemistry*. 23 (2021). <https://doi.org/10.1039/d1gc02496e>.
